# Supplementary material
Source: publisher figshare collection journal article supplement (https://tandf.figshare.com/articles/dataset/_/22344501)

# Bycatch species distribution from mid-water trawlers in the north-eastern Arabian Sea: A step towards the implementation of Marine Spatial Planning

P. Abdul Azeez<sup>a</sup>, Prathibha Rohit<sup>a</sup>, K. Mohammed Koya<sup>a</sup>, Latha Shenoy<sup>b</sup>, A. K. Jaiswar<sup>b</sup>, Mini Raman<sup>c</sup>, Shikha Rahangdale<sup>a</sup>, Divu Damodaran<sup>a</sup>

<sup>a</sup>ICAR-Central Marine Fisheries research Institute, Kochi, India; <sup>b</sup>ICAR-Central Institute of Fisheries Education, Mumbai, India  
<sup>c</sup>Space Applications Centre-ISRO, Ahmedabad, India

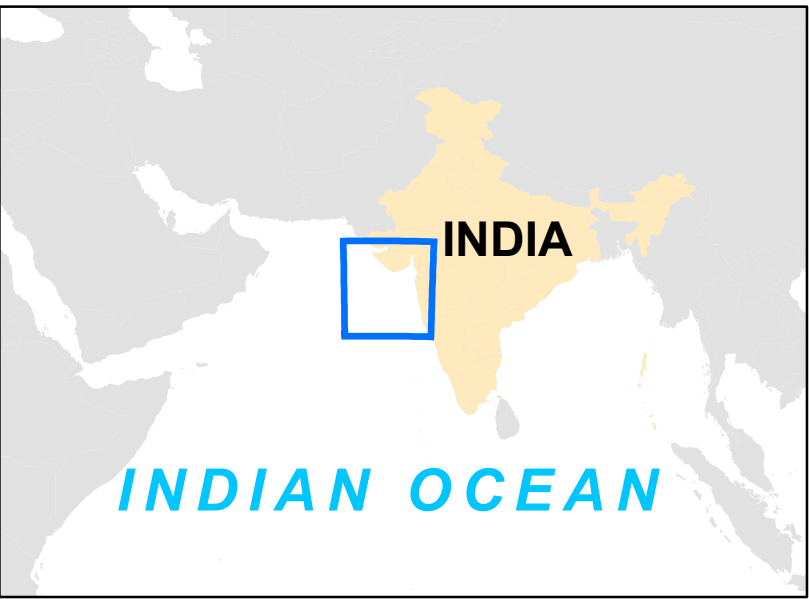

**Map Information**  
Projection: UTM, Zone 42 N  
Datum: WGS 1984  
Unit: Meter  
Catch rate is standardized catch of target fish using Catch Per Unit Effort (CPUE) in kilogram per hour (kg/h).  
Bycatch rate is standardized catch of non-target fish using Catch Per Unit Effort (CPUE) in kilogram per hour (kg/h).  
CPUE is transformed to natural logarithm (log-kg/h).  
Data source: Logbook of multiday mid-water trawlers operating in the northwest coast of India during 2017-2019.

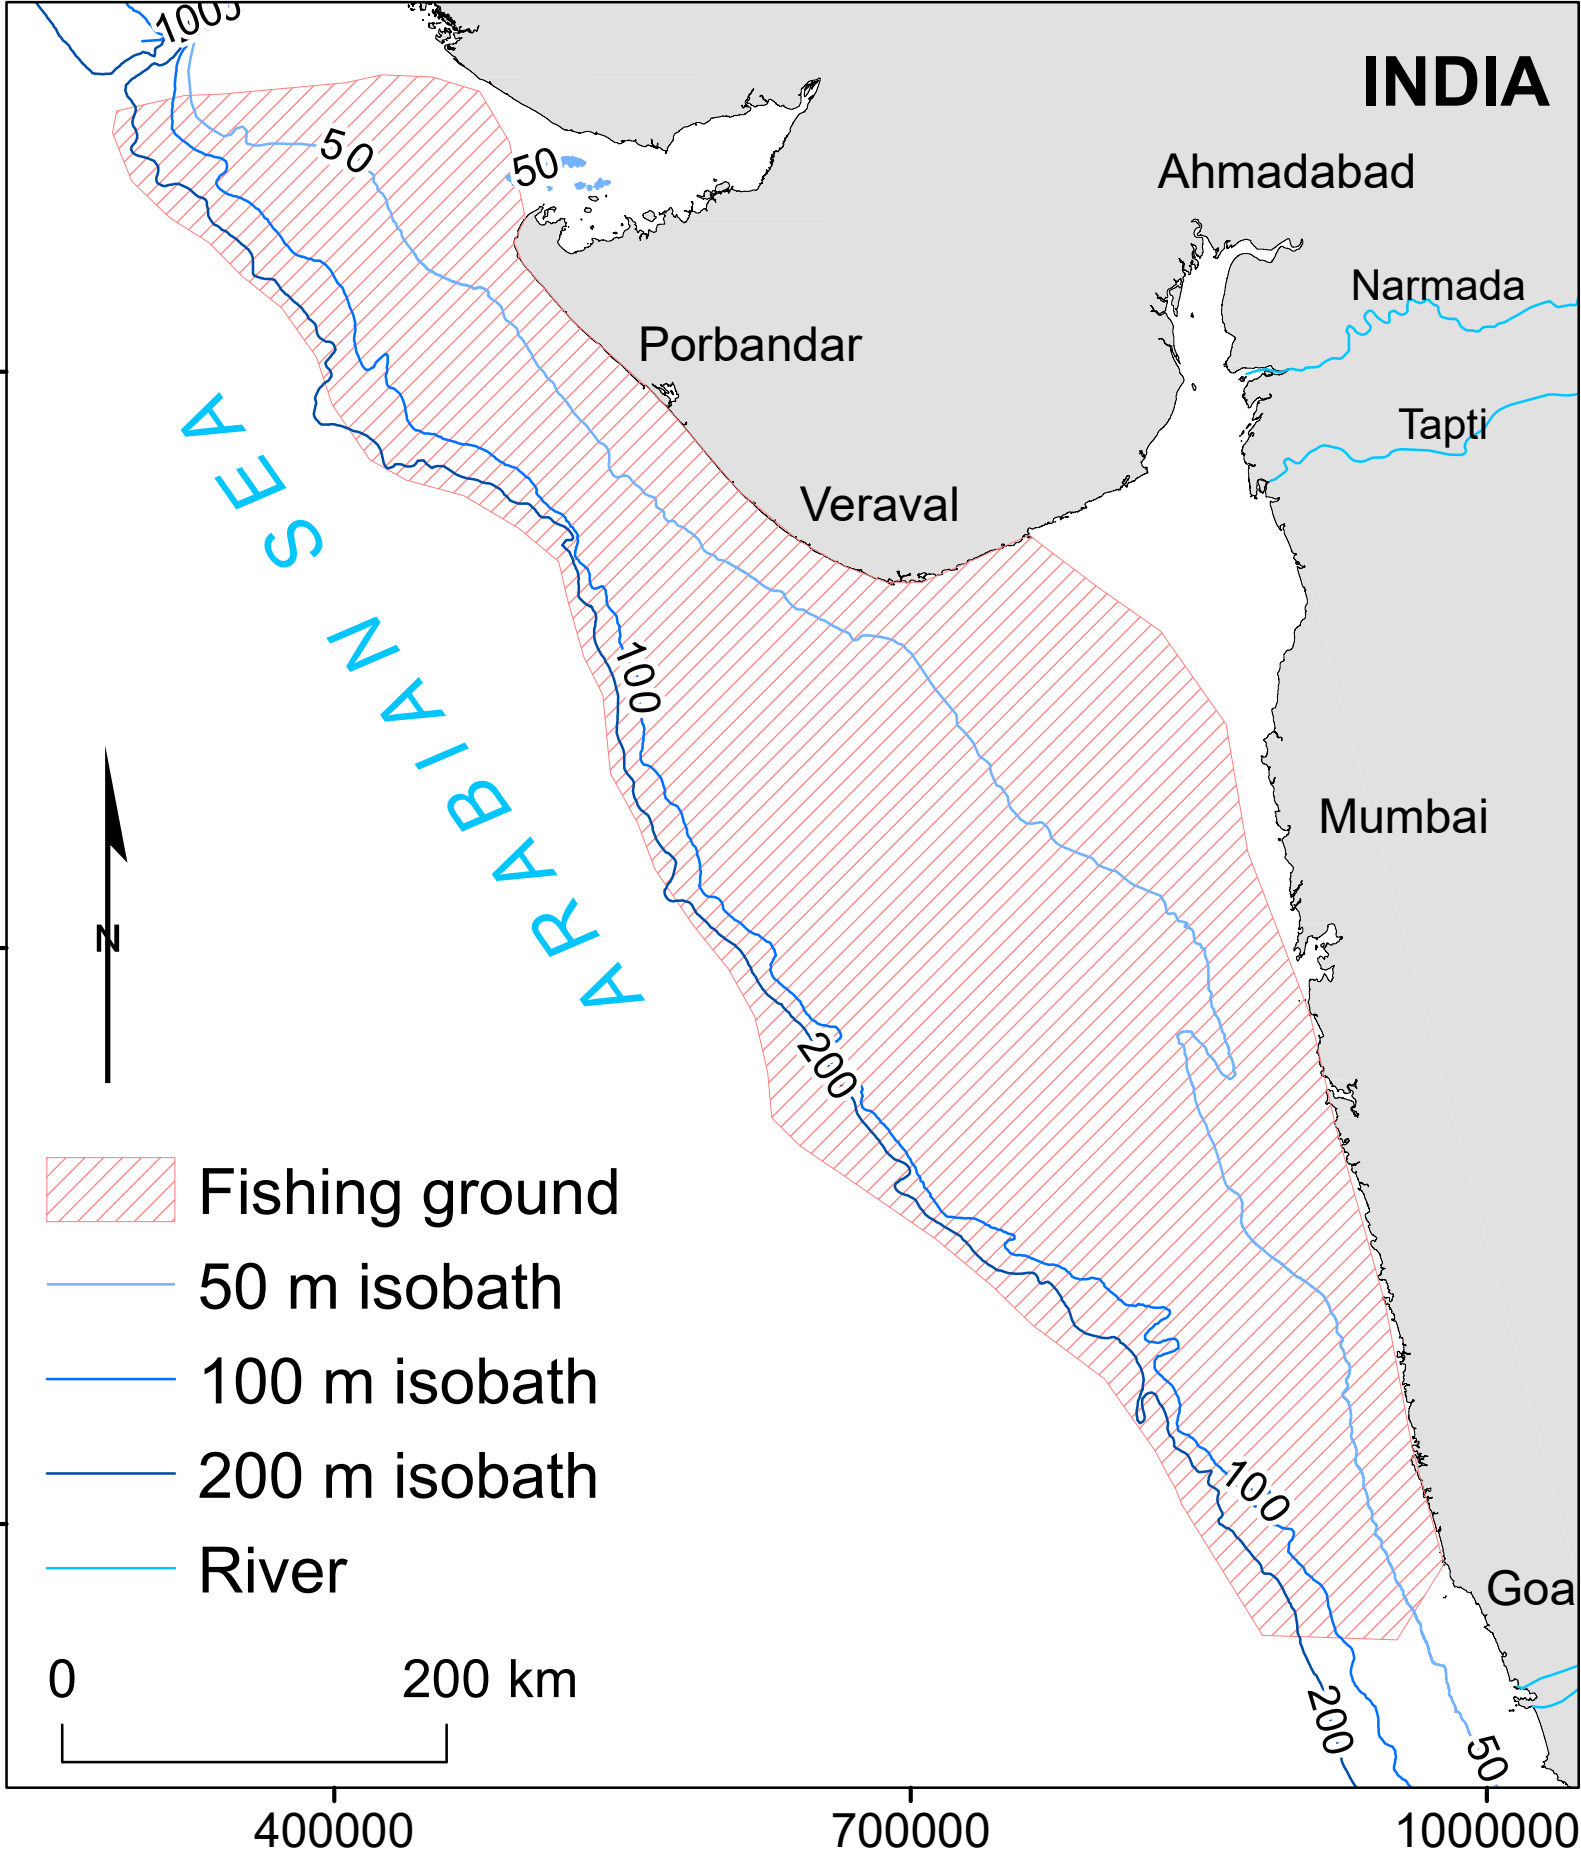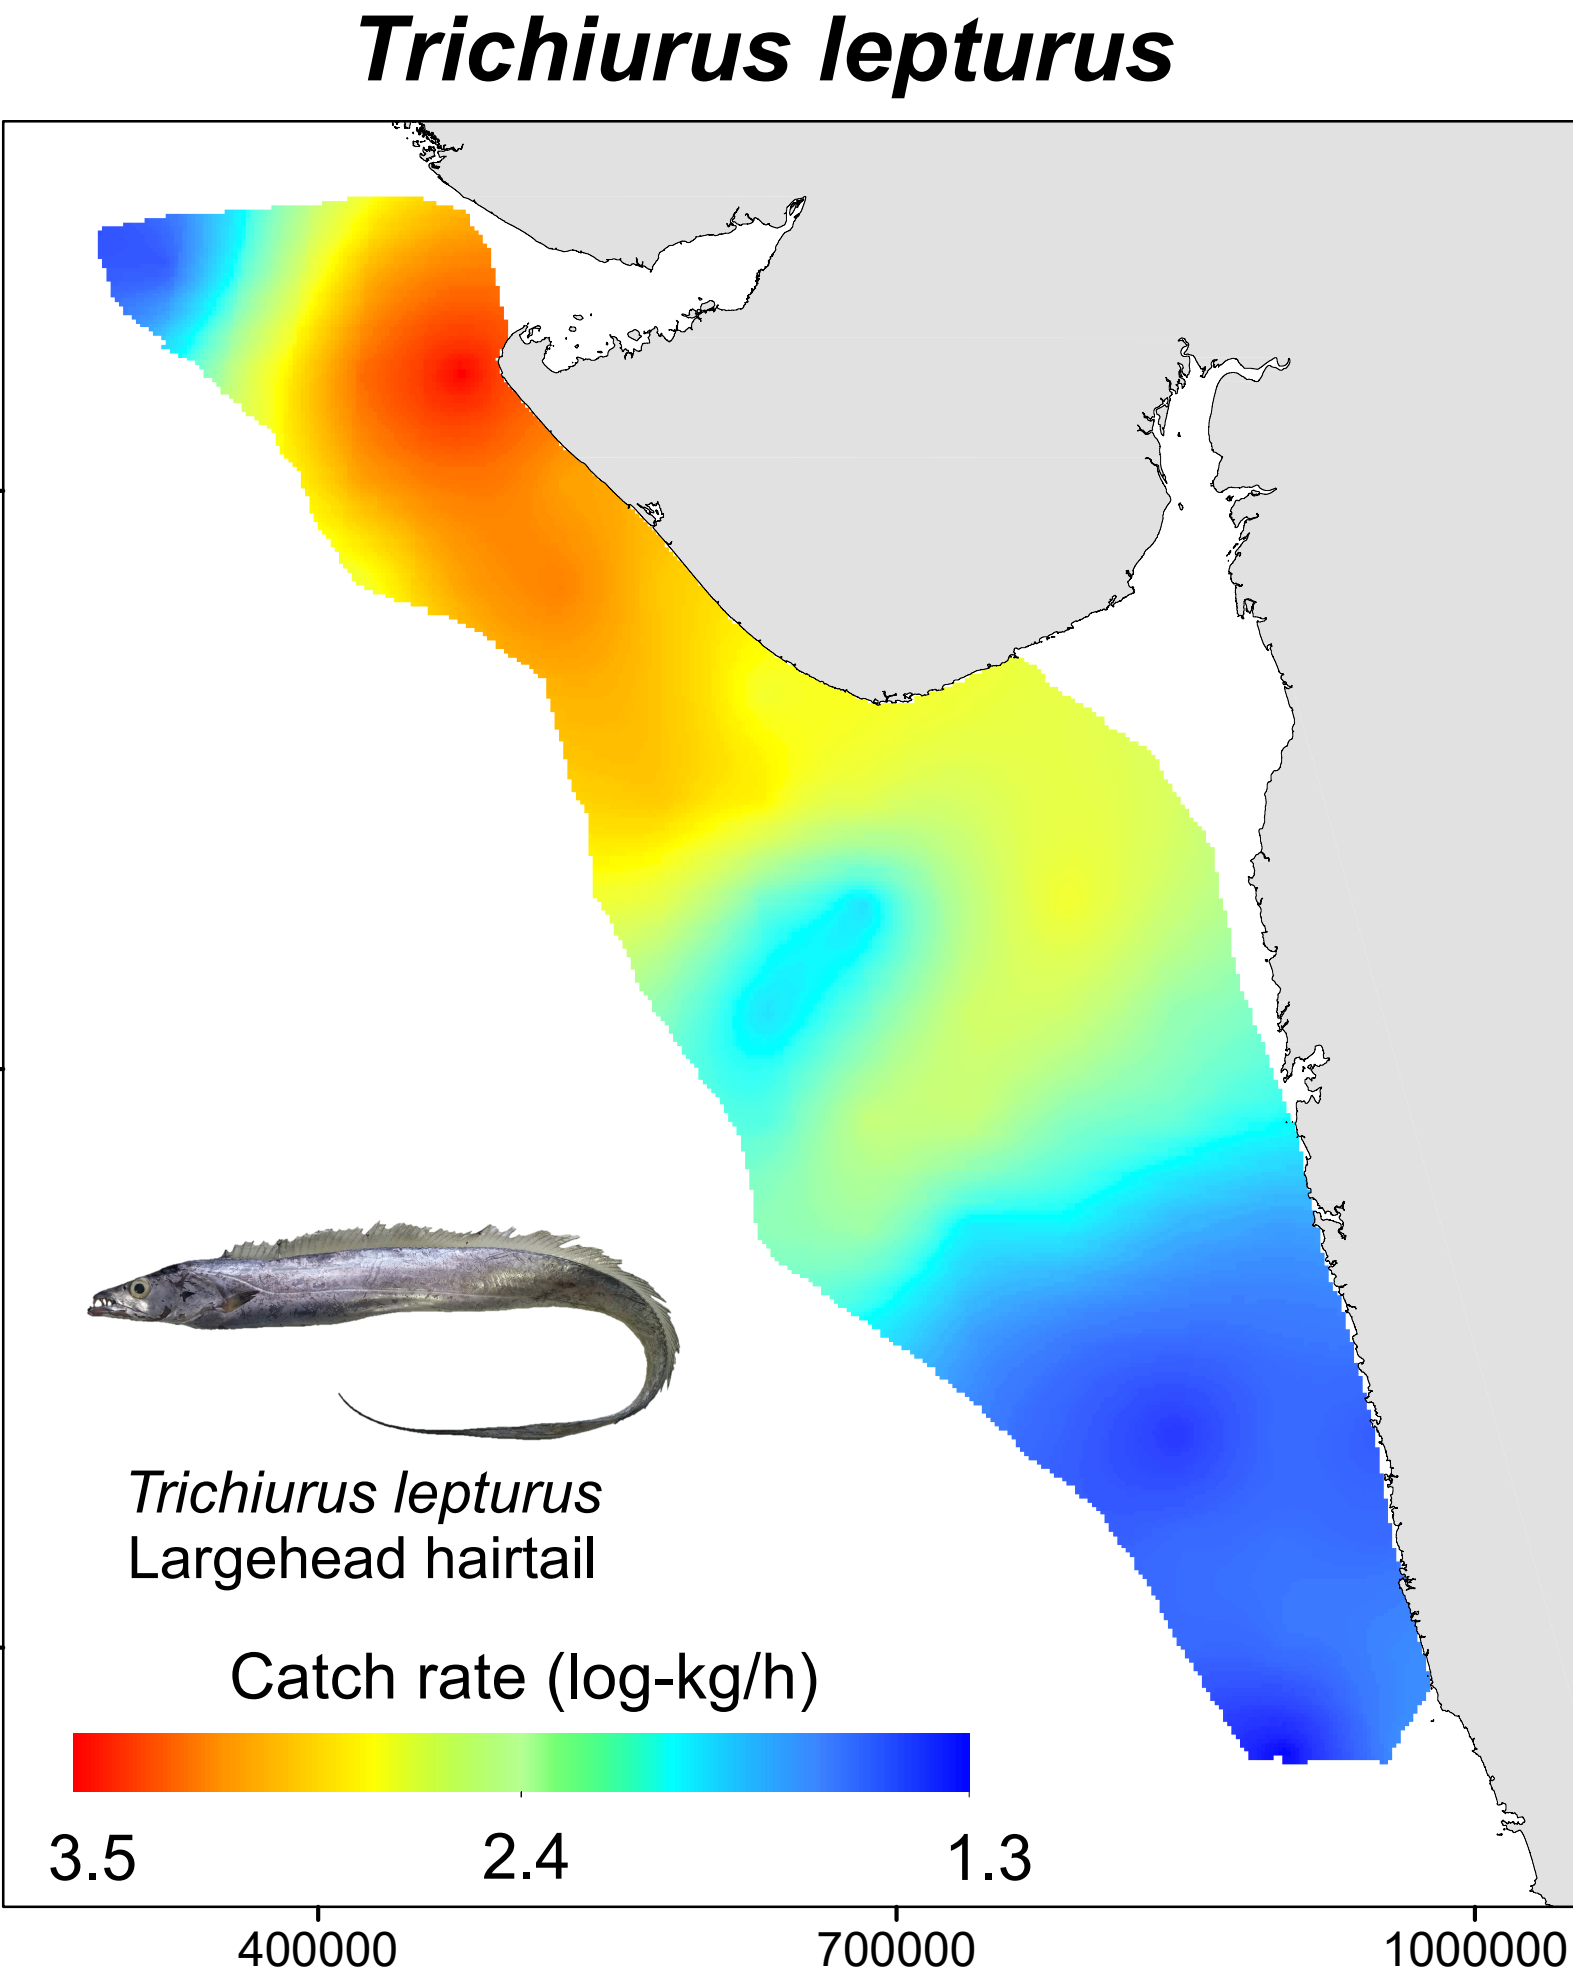

## Bycatch species distribution

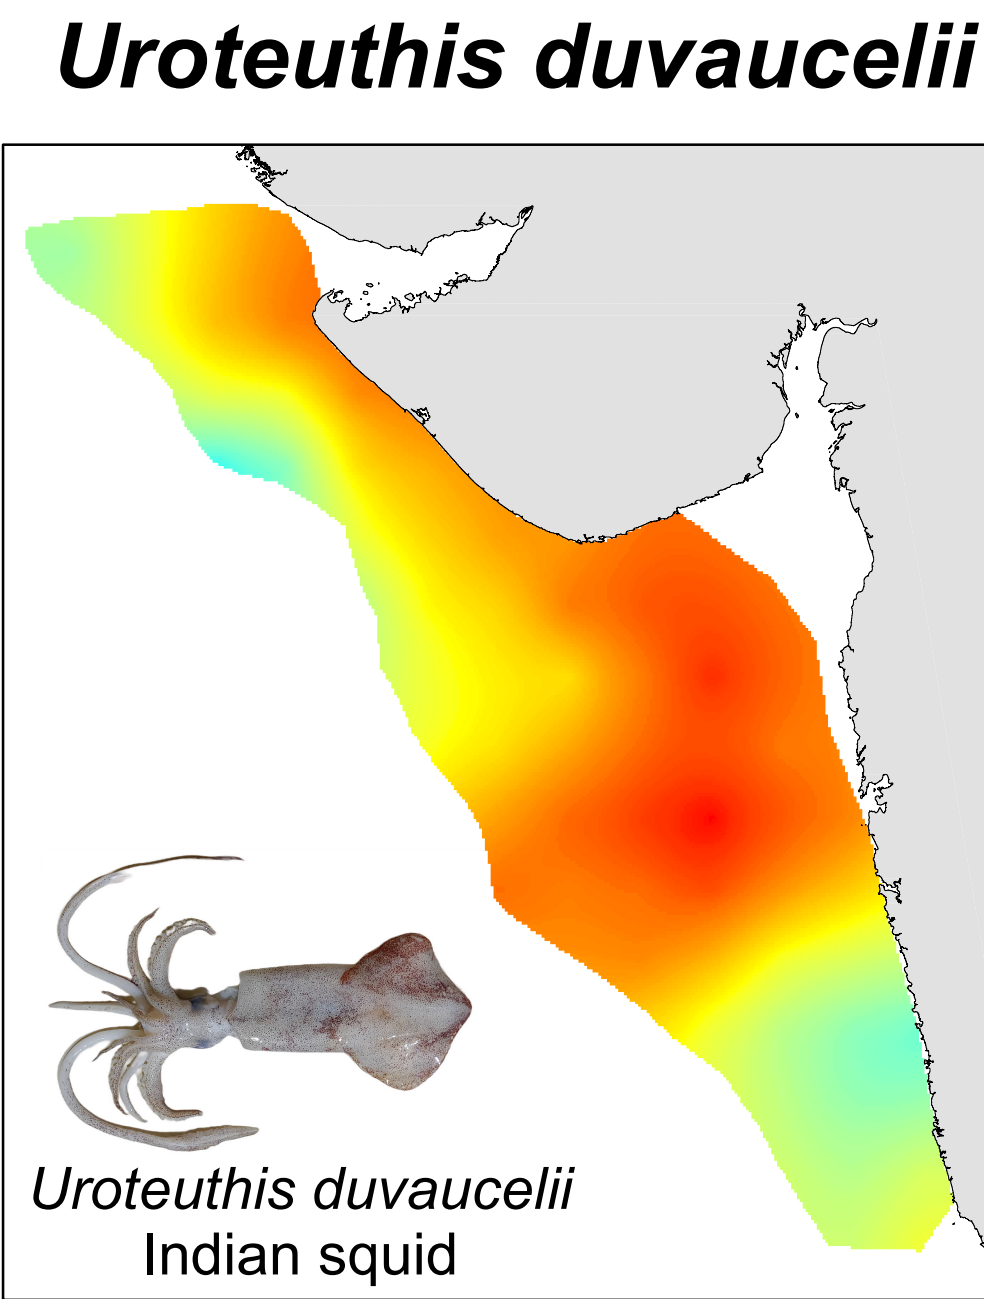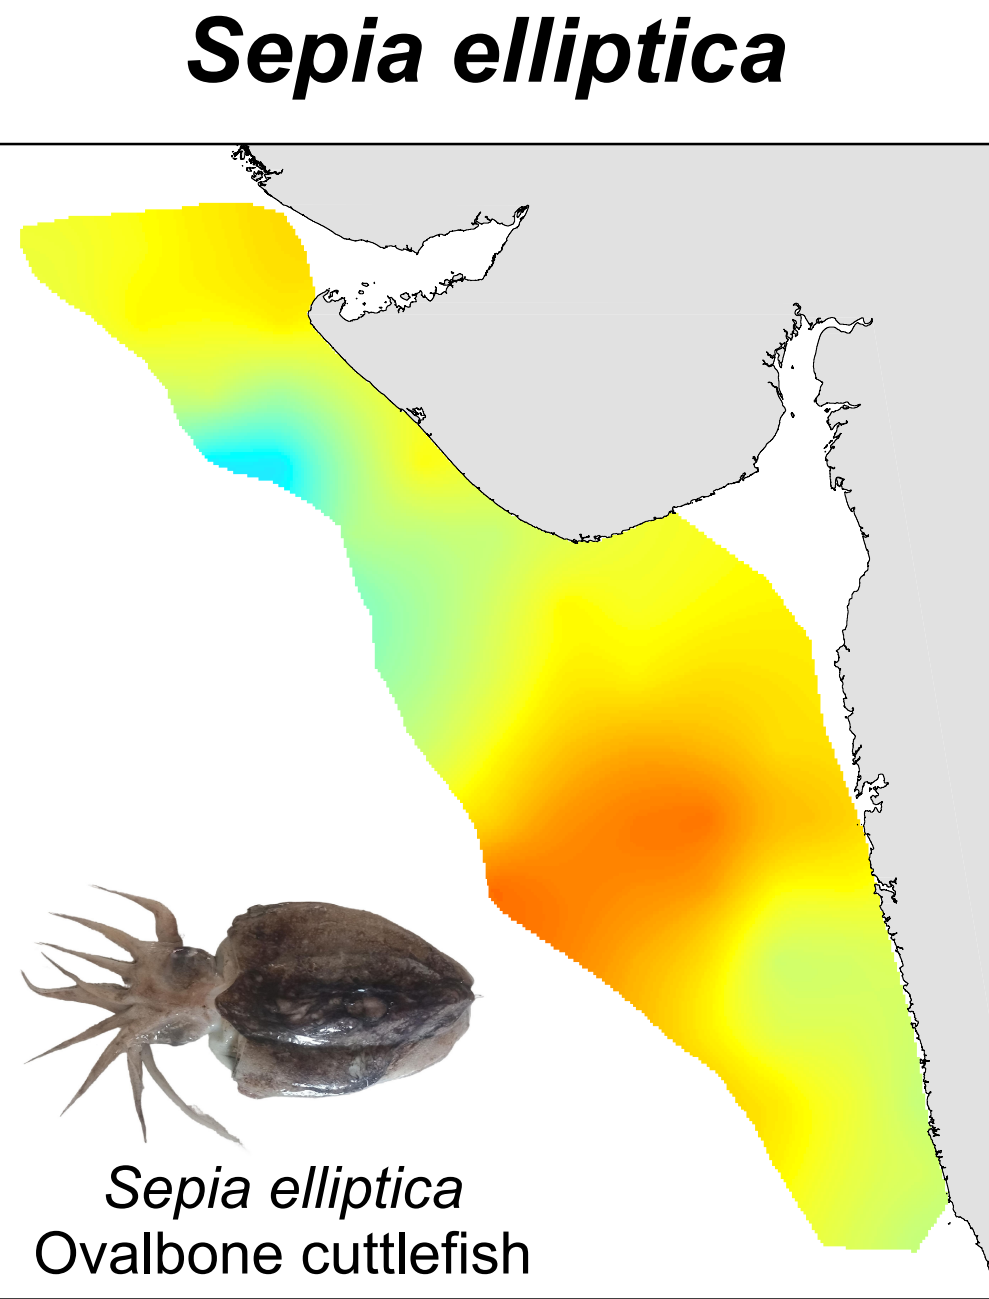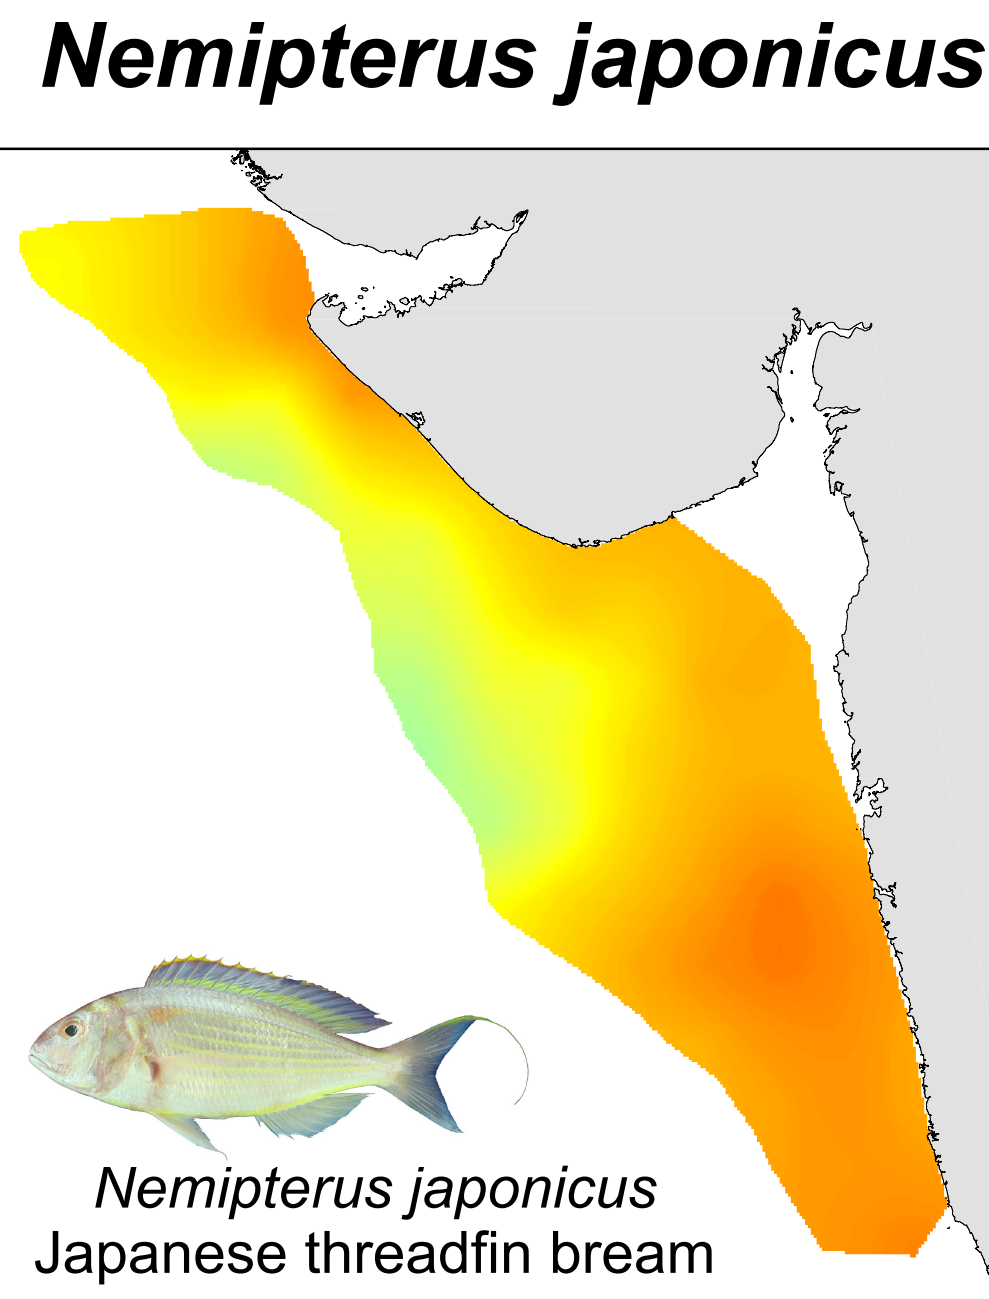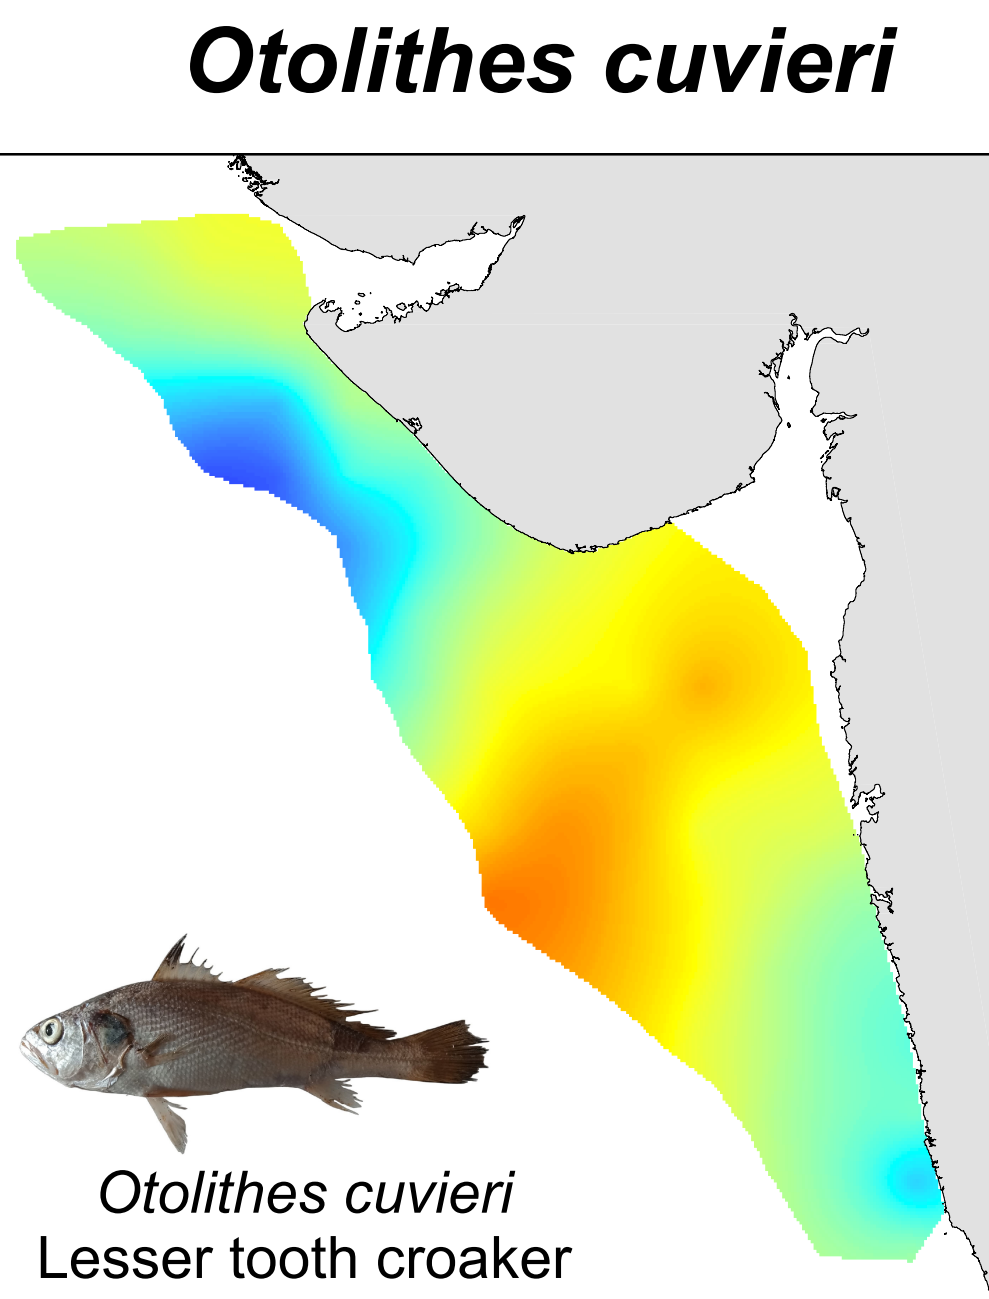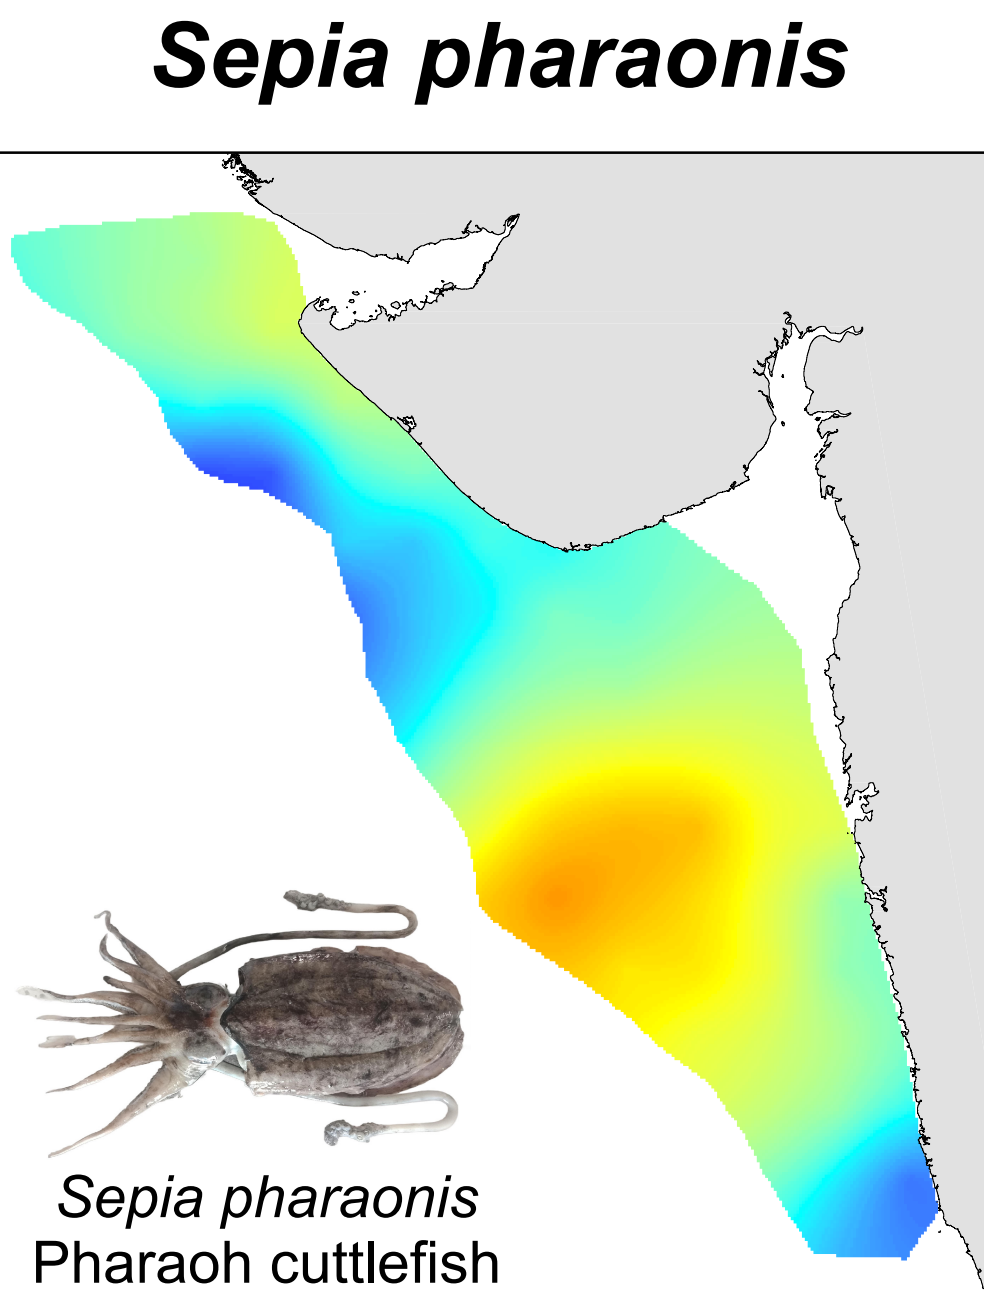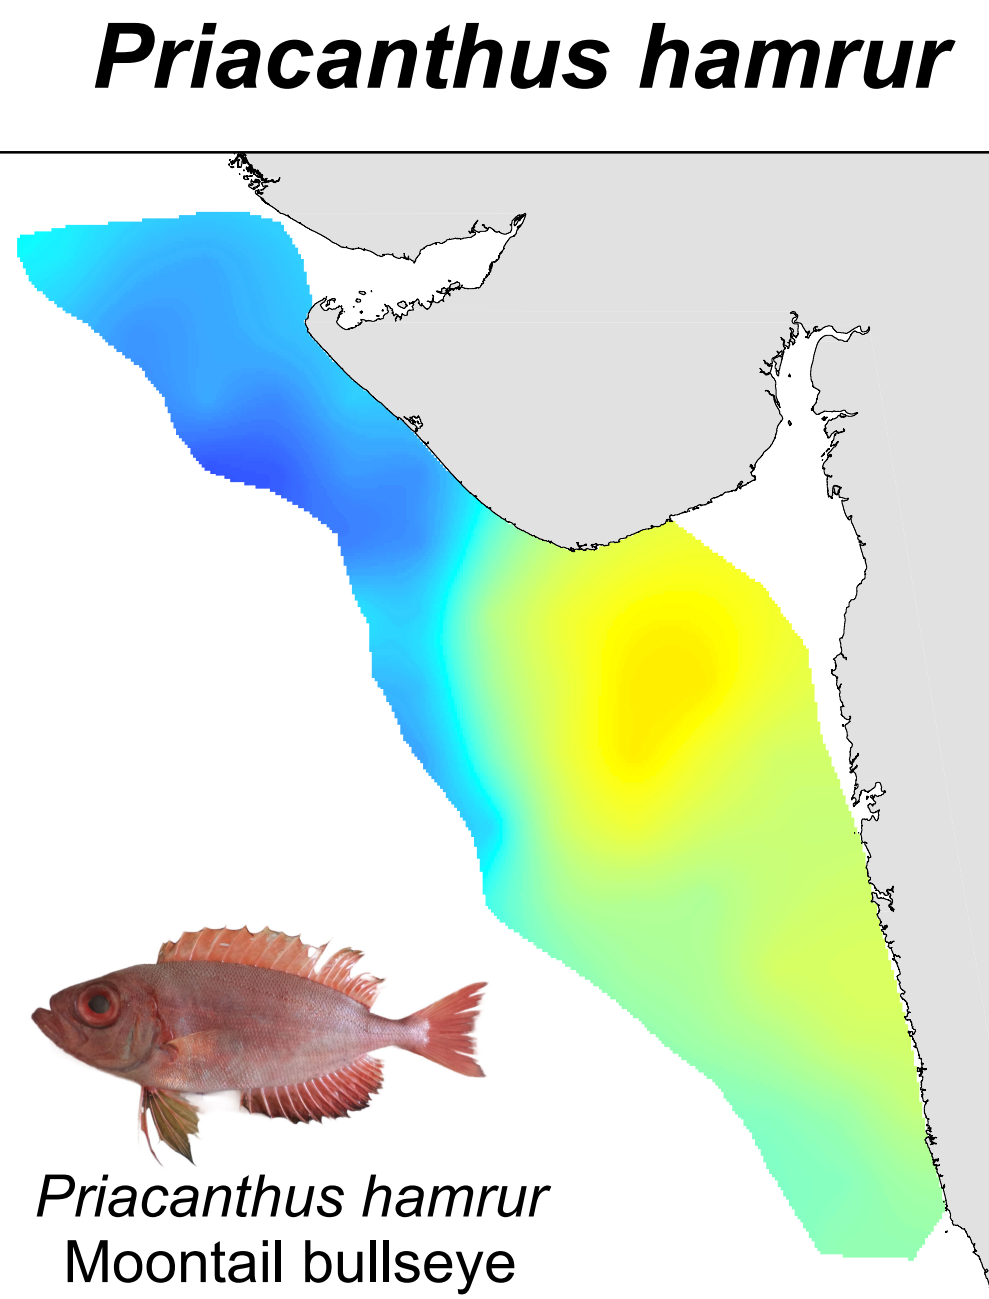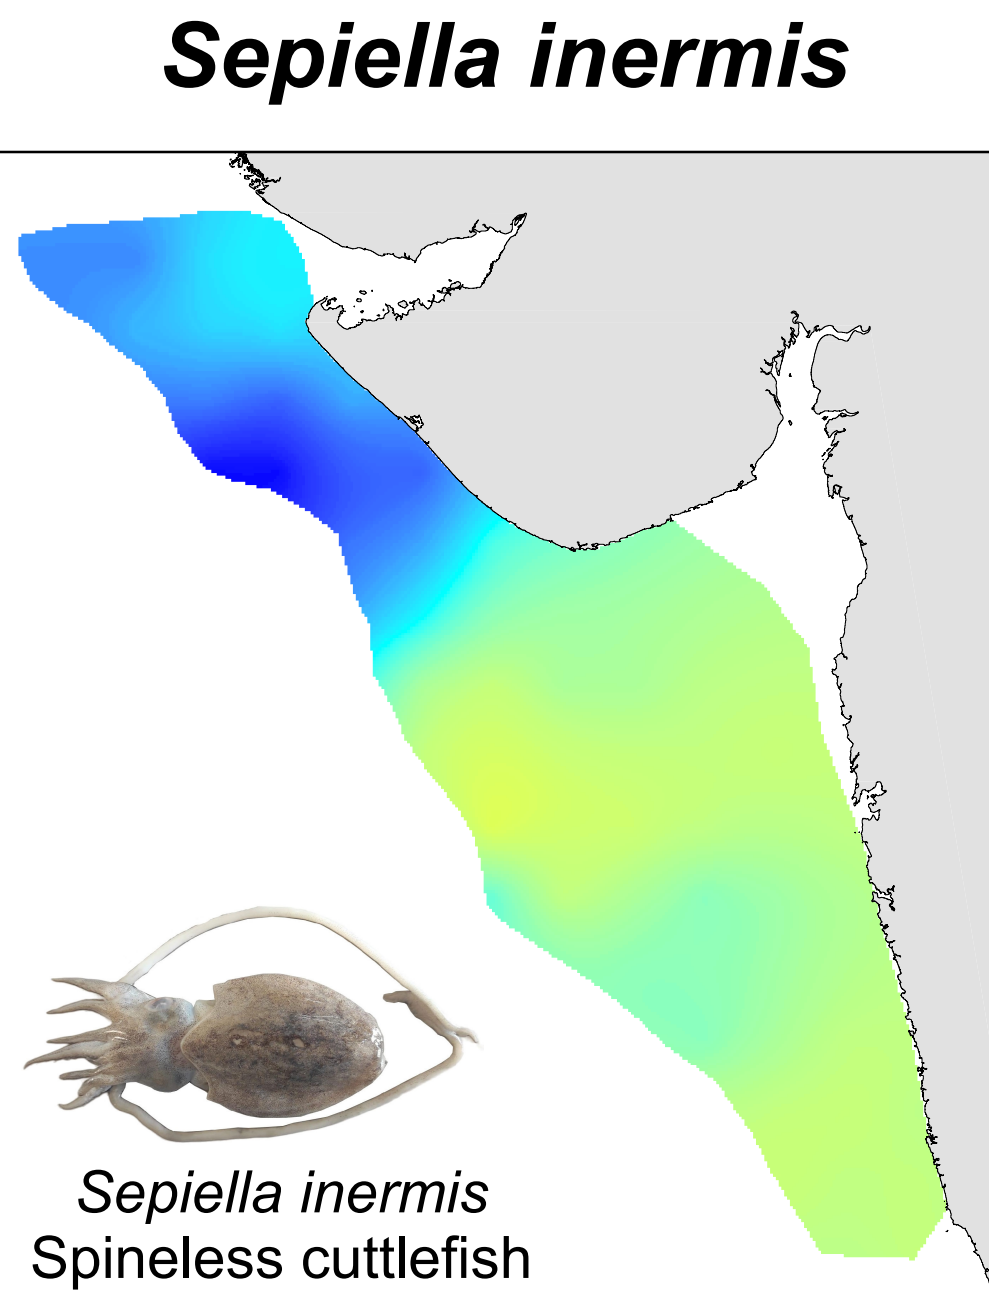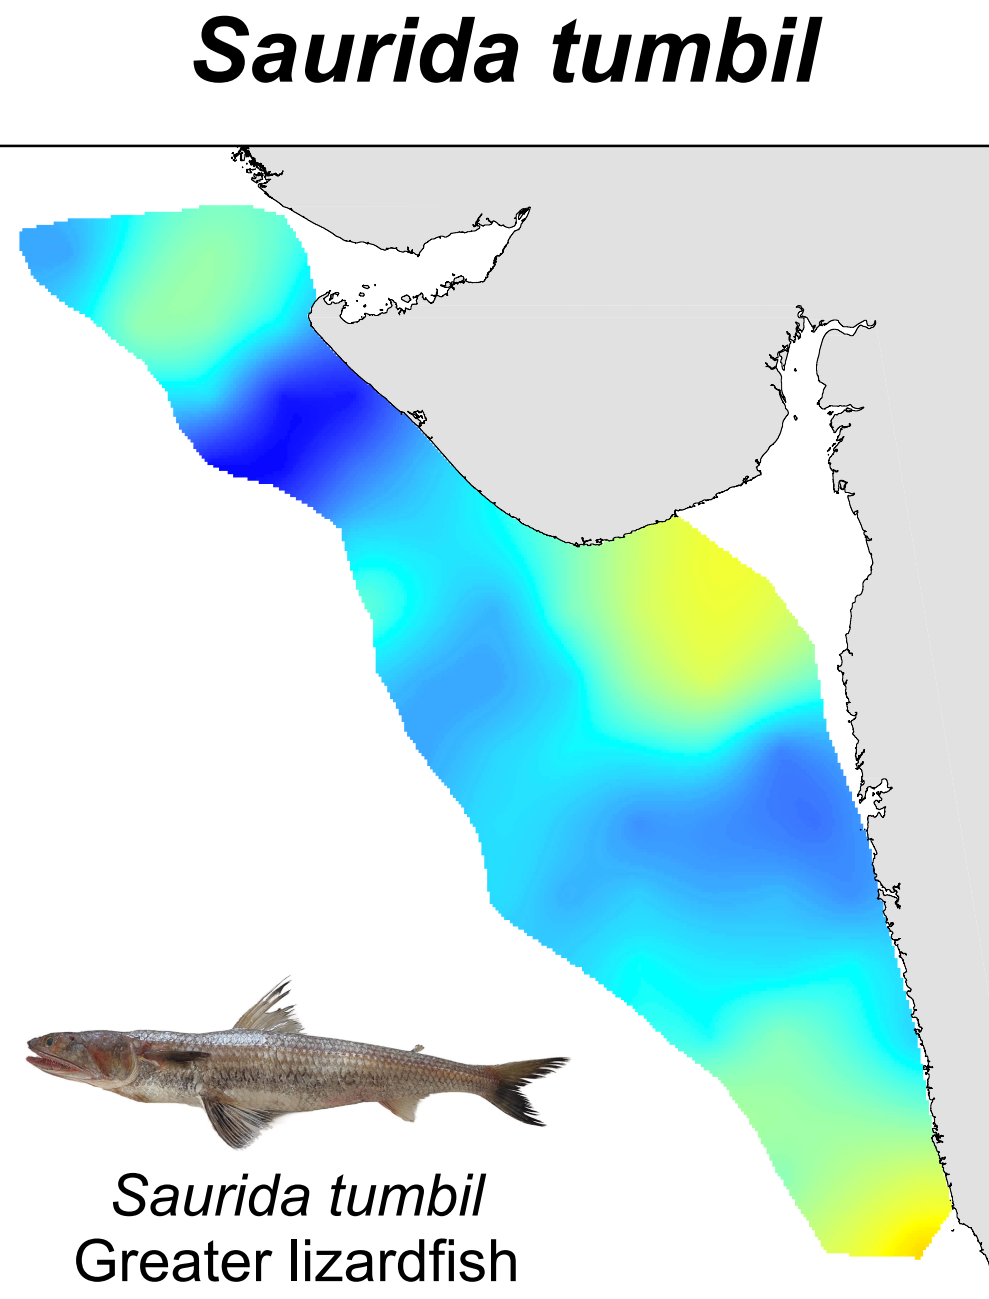

0 200 km

Bycatch rate (log-kg/h)

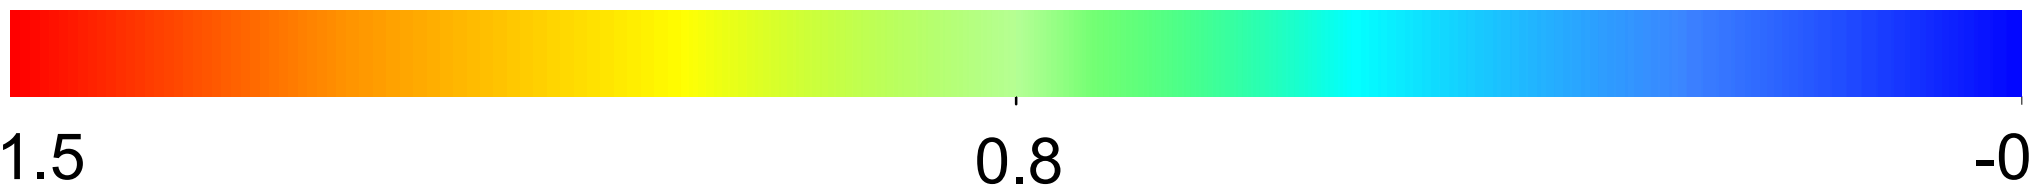

Supplement: Supplementary file 1 [file 1]
